# Supplementary material for: Gene-expression analysis of gleason grade 3 tumor glands embedded in low- and high-risk prostate cancer
Source: PubMed Central journal article supplement (PMC5122354; doi:10.18632/oncotarget.9344), 2016-05-13
Supplement: oncotarget-07-37846-s001.pdf [file oncotarget-07-37846-s001.pdf]

## Gene-expression analysis of gleason grade 3 tumor glands embedded in low- and high-risk prostate cancer

### Supplementary Materials

**Supplementary Table S1: List of genes over-expressed in Gleason grade 3 tumor glands being part of a Gleason score 4 + 3 = 7 as compared to Gleason score 3 + 3 = 6**

| Gene      | logFC | logCPM | p-value |
|-----------|-------|--------|---------|
| GLYATL3   | -9,36 | -1,72  | 0,00    |
| CDC20B    | -8,71 | -2,86  | 0,00    |
| ZIC1      | -8,53 | -3,48  | 0,00    |
| COX7B2    | -8,11 | -3,01  | 0,00    |
| HORMAD2   | -8,07 | -4,04  | 0,00    |
| ENTHD1    | -7,95 | -4,03  | 0,00    |
| FEZF2     | -7,62 | -4,74  | 0,00    |
| IBSP      | -7,39 | -4,95  | 0,01    |
| DYTN      | -7,39 | -4,68  | 0,00    |
| MAGEC2    | -7,36 | -4,69  | 0,00    |
| OR8A1     | -7,16 | -4,17  | 0,00    |
| SLC17A4   | -7,16 | -3,74  | 0,00    |
| NXPH1     | -7,12 | -5,02  | 0,00    |
| PDIA2     | -7,03 | -4,78  | 0,00    |
| PNLIPRP3  | -6,98 | -4,17  | 0,00    |
| ZIC4      | -6,88 | -5,05  | 0,01    |
| CYP1A2    | -6,88 | -4,23  | 0,00    |
| OR8D1     | -6,78 | -4,47  | 0,00    |
| HOXC13    | -6,47 | -4,68  | 0,00    |
| CREG2     | -6,46 | -0,56  | 0,00    |
| CHODL-AS1 | -6,40 | -4,77  | 0,01    |
| OR52N2    | -6,40 | -5,10  | 0,00    |
| DMP1      | -6,33 | -5,91  | 0,04    |
| LILRA4    | -6,25 | -5,74  | 0,01    |
| MUC6      | -6,25 | 1,69   | 0,00    |
| PTX4      | -6,23 | -2,38  | 0,00    |
| AFP       | -6,17 | -5,24  | 0,01    |
| CCDC144NL | -6,17 | -5,67  | 0,01    |
| TAG       | -6,17 | -5,16  | 0,01    |
| CEACAM7   | -5,99 | -5,49  | 0,01    |
| SPATA21   | -5,99 | -5,47  | 0,00    |
| KCNH7     | -5,98 | -0,12  | 0,00    |
| ANKUB1    | -5,89 | -6,08  | 0,04    |
| PADI3     | -5,89 | -5,43  | 0,02    |
| MUC21     | -5,89 | -5,60  | 0,01    |
| ANKRD30A  | -5,89 | -1,77  | 0,00    |

|            |       |       |      |
|------------|-------|-------|------|
| KLRC2      | -5,79 | -6,23 | 0,04 |
| H1FNT      | -5,79 | -6,07 | 0,03 |
| PLA2G4B    | -5,79 | -5,85 | 0,02 |
| MAGEC1     | -5,79 | -5,71 | 0,02 |
| PPP1R42    | -5,79 | -5,77 | 0,01 |
| DIRAS2     | -5,77 | -3,18 | 0,00 |
| FGF20      | -5,68 | -6,27 | 0,05 |
| OR8G5      | -5,68 | -5,55 | 0,02 |
| TPTE       | -5,68 | -5,55 | 0,02 |
| GCM1       | -5,68 | -5,85 | 0,02 |
| RGS6       | -5,68 | -5,31 | 0,01 |
| KCNV1      | -5,55 | -5,68 | 0,02 |
| SSX1       | -5,55 | -5,68 | 0,02 |
| INSL3      | -5,55 | -6,19 | 0,02 |
| RPRML      | -5,55 | -5,66 | 0,01 |
| CNPY1      | -5,42 | -5,83 | 0,03 |
| IL36RN     | -5,42 | -6,01 | 0,03 |
| BARX1      | -5,42 | -5,65 | 0,02 |
| LHX2       | -5,42 | -5,96 | 0,01 |
| MAGEA8     | -5,32 | -3,54 | 0,00 |
| HNFI1A-AS1 | -5,27 | -6,09 | 0,05 |
| DCAF4L2    | -5,27 | -5,99 | 0,04 |
| DHH        | -5,27 | -6,06 | 0,03 |
| INSL6      | -5,27 | -5,69 | 0,03 |
| ABRA       | -5,27 | -5,94 | 0,01 |
| TNNI3      | -5,10 | -6,18 | 0,05 |
| CHRM4      | -5,10 | -6,64 | 0,04 |
| TRPC3      | -5,10 | -6,55 | 0,04 |
| KRT73      | -5,10 | -6,16 | 0,04 |
| TDO2       | -5,10 | -1,44 | 0,00 |
| NETO1      | -5,02 | -2,70 | 0,00 |
| PPP3R2     | -5,02 | -2,73 | 0,00 |
| CFHR4      | -4,92 | -6,54 | 0,05 |
| IL9R       | -4,92 | -6,33 | 0,04 |
| FAM92B     | -4,92 | -6,68 | 0,03 |
| IFNG       | -4,92 | -6,64 | 0,02 |
| TUBA4B     | -4,80 | -4,78 | 0,01 |
| WDR72      | -4,78 | -2,60 | 0,00 |
| TRDN       | -4,78 | -2,27 | 0,00 |
| PRRG3      | -4,70 | -6,16 | 0,03 |
| GRIK4      | -4,66 | -4,41 | 0,01 |
| LY6D       | -4,58 | -1,75 | 0,00 |
| SLC4A8     | -4,49 | -3,19 | 0,00 |
| HSPA6      | -4,46 | -1,21 | 0,00 |
| CNTNAP5    | -4,45 | -5,14 | 0,01 |
| CYP11A1    | -4,45 | -4,42 | 0,00 |

|           |       |       |      |
|-----------|-------|-------|------|
| LRRIQ4    | -4,39 | -5,32 | 0,03 |
| PROK2     | -4,39 | -4,21 | 0,00 |
| ACCN1     | -4,38 | -4,59 | 0,00 |
| MYT1      | -4,31 | -4,33 | 0,00 |
| METTL7B   | -4,28 | -3,31 | 0,00 |
| ZNF804B   | -4,26 | -3,53 | 0,00 |
| OLFM4     | -4,25 | 4,36  | 0,00 |
| OMD       | -4,23 | 1,41  | 0,00 |
| TDRD9     | -4,19 | -3,40 | 0,01 |
| KLK14     | -4,13 | -2,40 | 0,00 |
| SLC18A3   | -4,13 | -5,55 | 0,04 |
| TULP2     | -4,08 | -2,96 | 0,00 |
| ZIC5      | -4,08 | -1,00 | 0,00 |
| ATP12A    | -4,05 | -5,46 | 0,02 |
| LINC00307 | -3,98 | -5,02 | 0,01 |
| GABRA2    | -3,98 | -5,33 | 0,00 |
| TTC29     | -3,96 | -4,82 | 0,00 |
| HAVCR1    | -3,90 | -5,02 | 0,01 |
| SLC13A1   | -3,81 | -4,95 | 0,01 |
| ACSM5     | -3,81 | -5,28 | 0,00 |
| POU5F1P4  | -3,80 | -2,14 | 0,01 |
| XIRP1     | -3,77 | -4,69 | 0,00 |
| HAO1      | -3,70 | -1,96 | 0,00 |
| PHOSPHO1  | -3,62 | -5,40 | 0,03 |
| HOXB7     | -3,54 | -4,46 | 0,01 |
| SLC6A17   | -3,50 | -1,07 | 0,00 |
| PON1      | -3,49 | 0,43  | 0,00 |
| KRTAP13-2 | -3,48 | -0,42 | 0,01 |
| SLC6A15   | -3,42 | -1,73 | 0,00 |
| RHCG      | -3,38 | -4,20 | 0,01 |
| CA1       | -3,38 | -4,08 | 0,02 |
| EFNA2     | -3,36 | -3,90 | 0,00 |
| DLEU7     | -3,35 | -4,29 | 0,03 |
| KRT2      | -3,34 | -4,42 | 0,00 |
| IGSF21    | -3,32 | -0,02 | 0,01 |
| SLC6A20   | -3,28 | -5,27 | 0,02 |
| FAM176A   | -3,28 | -4,80 | 0,00 |
| CXCL9     | -3,25 | 1,72  | 0,00 |
| DSCAM-AS1 | -3,22 | -0,86 | 0,00 |
| HIST1H2AB | -3,14 | -6,05 | 0,04 |
| CDHR4     | -3,13 | -5,15 | 0,05 |
| HOXB9     | -3,12 | -2,48 | 0,01 |
| PLAT      | -3,12 | 2,65  | 0,00 |
| FGF12     | -3,11 | 0,59  | 0,00 |
| HCN4      | -3,07 | -4,97 | 0,01 |
| MKRN3     | -3,06 | -3,18 | 0,01 |
| KRT13     | -3,06 | 0,95  | 0,01 |

|            |       |       |      |
|------------|-------|-------|------|
| NBEAP1     | -3,06 | 0,82  | 0,00 |
| KIAA1239   | -3,06 | -4,56 | 0,05 |
| DNAH3      | -3,05 | -3,15 | 0,01 |
| ZIC2       | -3,05 | -0,64 | 0,00 |
| SCML4      | -3,02 | -4,32 | 0,01 |
| UNC5A      | -3,00 | 0,91  | 0,00 |
| DDC        | -2,98 | -2,65 | 0,00 |
| TMEM63C    | -2,97 | -2,26 | 0,03 |
| HOGA1      | -2,97 | -5,28 | 0,01 |
| FOXN4      | -2,96 | -3,50 | 0,04 |
| PCDHB3     | -2,96 | 1,18  | 0,00 |
| ZNF536     | -2,94 | -3,29 | 0,00 |
| GRIN3A     | -2,92 | 2,08  | 0,00 |
| CXCR2      | -2,88 | -5,35 | 0,02 |
| SLC22A14   | -2,88 | -5,21 | 0,02 |
| FOXS1      | -2,85 | -4,44 | 0,01 |
| TMPRSS4    | -2,84 | -1,80 | 0,01 |
| TNNT1      | -2,83 | -4,43 | 0,01 |
| CXCL6      | -2,82 | -3,61 | 0,00 |
| SLPI       | -2,82 | -0,54 | 0,00 |
| ST6GALNAC5 | -2,80 | -0,56 | 0,00 |
| SLC22A10   | -2,79 | -2,13 | 0,00 |
| IL12RB1    | -2,78 | -4,38 | 0,04 |
| BMX        | -2,78 | -4,59 | 0,01 |
| B3GALT5    | -2,77 | -3,97 | 0,03 |
| GPR158     | -2,76 | 0,70  | 0,00 |
| NMNAT2     | -2,76 | -0,30 | 0,00 |
| DCLK1      | -2,76 | 0,76  | 0,00 |
| HOXC4      | -2,72 | -0,44 | 0,00 |
| SI         | -2,68 | 2,37  | 0,00 |
| CA4        | -2,68 | -3,83 | 0,01 |
| WNT10B     | -2,67 | -5,59 | 0,01 |
| NLGN4X     | -2,65 | 0,14  | 0,04 |
| KRT4       | -2,63 | -1,89 | 0,02 |
| VWA7       | -2,61 | -3,10 | 0,00 |
| PAX1       | -2,60 | -3,47 | 0,04 |
| CES3       | -2,59 | -1,37 | 0,00 |
| UTS2D      | -2,58 | -2,13 | 0,02 |
| DHRS2      | -2,57 | -3,62 | 0,00 |
| TEKT1      | -2,57 | -4,93 | 0,03 |
| HAL        | -2,56 | -5,82 | 0,03 |
| ZBBX       | -2,54 | -3,52 | 0,03 |
| UGT8       | -2,53 | -3,78 | 0,00 |
| UPB1       | -2,52 | -4,56 | 0,01 |
| EEF1A2     | -2,52 | 0,02  | 0,00 |
| CGA        | -2,52 | -2,92 | 0,04 |
| MMP13      | -2,51 | -3,46 | 0,03 |

|           |       |       |      |
|-----------|-------|-------|------|
| SIGLEC1   | -2,51 | -2,60 | 0,00 |
| CAPN14    | -2,50 | -3,55 | 0,00 |
| SPON2     | -2,47 | 5,98  | 0,00 |
| DUOX2     | -2,47 | -0,66 | 0,01 |
| SCG5      | -2,46 | -2,50 | 0,04 |
| PTGFR     | -2,45 | -1,85 | 0,00 |
| CORT      | -2,44 | -4,97 | 0,02 |
| COL12A1   | -2,43 | 7,01  | 0,00 |
| CCDC141   | -2,39 | 1,38  | 0,00 |
| CCL4      | -2,38 | -2,42 | 0,00 |
| TMPRSS11A | -2,36 | -3,94 | 0,04 |
| TSPO2     | -2,35 | -5,47 | 0,05 |
| NPPC      | -2,35 | -2,81 | 0,00 |
| TLR8      | -2,32 | -4,18 | 0,02 |
| MUC4      | -2,31 | 1,14  | 0,00 |
| SHCBP1    | -2,31 | -3,33 | 0,00 |
| CCL3      | -2,30 | -2,22 | 0,01 |
| AK5       | -2,28 | 1,24  | 0,00 |
| SLC16A6   | -2,26 | -2,00 | 0,01 |
| HOXD-AS1  | -2,25 | -0,85 | 0,01 |
| GRM7      | -2,25 | -3,17 | 0,02 |
| TLE6      | -2,25 | -5,27 | 0,04 |
| RORB      | -2,24 | 0,33  | 0,00 |
| ALB       | -2,23 | -1,93 | 0,00 |
| CDT1      | -2,23 | -2,14 | 0,03 |
| NTNG1     | -2,23 | 0,84  | 0,00 |
| E2F2      | -2,23 | -2,55 | 0,00 |
| E2F7      | -2,22 | -1,81 | 0,00 |
| COL11A1   | -2,22 | -4,89 | 0,04 |
| FOXJ1     | -2,21 | -2,03 | 0,01 |
| CLCA4     | -2,21 | -2,30 | 0,02 |
| SERPINA4  | -2,20 | -4,39 | 0,01 |
| RS1       | -2,19 | -4,80 | 0,05 |
| XIRP2     | -2,18 | -3,96 | 0,03 |
| FBXL16    | -2,17 | -1,76 | 0,00 |
| ZMYND10   | -2,17 | -2,58 | 0,01 |
| SEMA3D    | -2,16 | 1,87  | 0,00 |
| KCNJ10    | -2,16 | -0,29 | 0,00 |
| IL11      | -2,15 | -5,83 | 0,04 |
| MUC13     | -2,15 | 1,07  | 0,00 |
| TPPP3     | -2,14 | -1,97 | 0,02 |
| GCNT3     | -2,14 | -2,99 | 0,02 |
| GMNC      | -2,13 | 1,36  | 0,02 |
| UCA1      | -2,13 | -4,78 | 0,05 |
| SLC38A4   | -2,12 | 0,59  | 0,00 |
| GDF11     | -2,10 | 1,45  | 0,00 |
| LANCL3    | -2,09 | -2,59 | 0,01 |

|         |       |       |      |
|---------|-------|-------|------|
| COCH    | -2,08 | -1,05 | 0,01 |
| ATP8A2  | -2,08 | 1,42  | 0,01 |
| SSTR1   | -2,07 | -0,05 | 0,02 |
| PKHD1   | -2,07 | -0,12 | 0,01 |
| LGALS2  | -2,07 | -4,75 | 0,02 |
| NRP1    | -2,06 | 2,74  | 0,00 |
| TMED6   | -2,03 | -1,31 | 0,00 |
| CCDC78  | -2,02 | -3,40 | 0,00 |
| GRPR    | -2,01 | 0,82  | 0,00 |
| CDH10   | -2,01 | -0,56 | 0,00 |
| BANK1   | -2,01 | 3,61  | 0,00 |
| LRRTM4  | -2,00 | -3,09 | 0,02 |
| HNF1A   | -2,00 | -2,40 | 0,00 |
| KRT20   | -2,00 | -2,87 | 0,01 |
| MOGAT2  | -2,00 | -3,56 | 0,02 |
| DLGAP5  | -1,99 | -1,13 | 0,00 |
| ODZ1    | -1,99 | 5,10  | 0,00 |
| PPFIA2  | -1,98 | 1,05  | 0,02 |
| RDH5    | -1,98 | -4,58 | 0,02 |
| KYNU    | -1,97 | -3,85 | 0,01 |
| MCOLN3  | -1,97 | -1,23 | 0,02 |
| LMX1B   | -1,96 | -1,74 | 0,00 |
| NKG7    | -1,96 | -3,49 | 0,04 |
| PYHIN1  | -1,96 | -3,37 | 0,01 |
| OLR1    | -1,95 | -1,11 | 0,00 |
| SDS     | -1,95 | -2,23 | 0,03 |
| CCDC83  | -1,95 | -2,65 | 0,04 |
| CSMD1   | -1,95 | -1,56 | 0,01 |
| KLHL6   | -1,93 | -2,48 | 0,00 |
| HOXC6   | -1,93 | 0,93  | 0,00 |
| SPATC1  | -1,92 | -4,40 | 0,00 |
| PLK1    | -1,92 | -1,31 | 0,00 |
| PIRT    | -1,91 | -3,47 | 0,03 |
| COL11A2 | -1,91 | -3,68 | 0,02 |
| MED12L  | -1,90 | 1,50  | 0,00 |
| PCDHA10 | -1,89 | -1,00 | 0,01 |
| TREM2   | -1,88 | -2,58 | 0,01 |
| RND1    | -1,87 | -1,16 | 0,00 |
| RAB39A  | -1,87 | -2,06 | 0,00 |
| E2F8    | -1,87 | -2,38 | 0,00 |
| PMS2P5  | -1,86 | -5,24 | 0,05 |
| MADCAM1 | -1,86 | -4,85 | 0,02 |
| MAOB    | -1,86 | 1,19  | 0,03 |
| CLSPN   | -1,85 | -1,62 | 0,00 |
| GJA3    | -1,85 | -2,34 | 0,02 |
| CEP55   | -1,84 | -1,77 | 0,01 |
| NUF2    | -1,84 | -2,91 | 0,03 |

|           |       |       |      |
|-----------|-------|-------|------|
| HAGHL     | -1,83 | -3,10 | 0,05 |
| CELSR3    | -1,83 | -0,40 | 0,00 |
| FOXL2     | -1,83 | -2,77 | 0,02 |
| HS6ST2    | -1,81 | -1,06 | 0,03 |
| APOE      | -1,81 | 0,89  | 0,00 |
| RFX6      | -1,80 | -2,28 | 0,05 |
| NAT8L     | -1,80 | -2,22 | 0,01 |
| CADPS     | -1,79 | -0,21 | 0,01 |
| MOB4      | -1,79 | -4,17 | 0,02 |
| MT1DP     | -1,79 | -4,09 | 0,01 |
| PTPRZ1    | -1,79 | -0,68 | 0,00 |
| IL1RAPL1  | -1,79 | -0,54 | 0,01 |
| PLTP      | -1,78 | 2,00  | 0,01 |
| PSMC3IP   | -1,77 | -2,48 | 0,00 |
| DUSP8     | -1,77 | 0,23  | 0,00 |
| GAPT      | -1,77 | -3,85 | 0,02 |
| OSM       | -1,76 | -5,23 | 0,03 |
| GSG2      | -1,74 | -2,30 | 0,01 |
| PBK       | -1,74 | -2,93 | 0,04 |
| CCDC19    | -1,73 | -3,02 | 0,04 |
| ULBP1     | -1,73 | -4,24 | 0,04 |
| LINC00173 | -1,73 | -4,05 | 0,03 |
| MYBL2     | -1,73 | -1,57 | 0,00 |
| ONECUT2   | -1,73 | 1,72  | 0,00 |
| ASF1B     | -1,72 | -1,75 | 0,01 |
| HS3ST1    | -1,72 | 0,76  | 0,01 |
| TMEM59L   | -1,72 | -2,77 | 0,03 |
| RASAL3    | -1,72 | -2,79 | 0,00 |
| ANKRD29   | -1,71 | -0,61 | 0,02 |
| ESPL1     | -1,71 | -1,58 | 0,02 |
| NEK2      | -1,70 | -2,25 | 0,02 |
| FAM171B   | -1,69 | 0,68  | 0,01 |
| MND1      | -1,69 | -3,42 | 0,00 |
| OSTalpha  | -1,69 | -0,84 | 0,03 |
| GPRC5A    | -1,69 | 3,39  | 0,03 |
| GFI1      | -1,68 | -1,93 | 0,02 |
| IL1RN     | -1,67 | -1,17 | 0,03 |
| LINGO3    | -1,67 | -4,49 | 0,04 |
| TNFSF8    | -1,66 | -2,19 | 0,00 |
| JAG1      | -1,66 | 3,04  | 0,00 |
| APOC1     | -1,66 | 0,62  | 0,01 |
| CD22      | -1,66 | -2,63 | 0,01 |
| GALNT13   | -1,66 | -1,80 | 0,04 |
| SUSD2     | -1,65 | -0,69 | 0,00 |
| CXCL11    | -1,65 | 0,05  | 0,02 |
| KIF18B    | -1,65 | -2,16 | 0,02 |
| POLQ      | -1,64 | -2,18 | 0,01 |

|               |       |       |      |
|---------------|-------|-------|------|
| PLA2G16       | -1,63 | 0,63  | 0,01 |
| GPR171        | -1,62 | -2,26 | 0,01 |
| GABRP         | -1,62 | 0,06  | 0,04 |
| FOLH1         | -1,61 | 4,67  | 0,00 |
| MSR1          | -1,61 | 0,38  | 0,00 |
| BIRC5         | -1,61 | -1,20 | 0,01 |
| MKI67         | -1,61 | 2,64  | 0,00 |
| ADAMTS3       | -1,60 | 1,62  | 0,00 |
| PTTG1         | -1,60 | -1,30 | 0,01 |
| CD163         | -1,60 | -0,91 | 0,00 |
| PHKG1         | -1,58 | -4,16 | 0,03 |
| MUC1          | -1,58 | -0,08 | 0,01 |
| NPY           | -1,58 | 7,45  | 0,02 |
| HAVCR2        | -1,57 | -1,90 | 0,01 |
| AURKB         | -1,57 | -3,00 | 0,01 |
| KCNJ12        | -1,56 | -2,67 | 0,03 |
| LPPR4         | -1,56 | -2,17 | 0,01 |
| CYP4Z2P       | -1,55 | -4,33 | 0,03 |
| HMMR          | -1,54 | -0,05 | 0,00 |
| VSIG4         | -1,54 | -1,78 | 0,00 |
| TPX2          | -1,53 | 0,57  | 0,00 |
| EGR1          | -1,53 | 6,27  | 0,00 |
| DIAPH3        | -1,53 | -0,98 | 0,04 |
| UFSP1         | -1,53 | -3,26 | 0,01 |
| AGT           | -1,52 | -2,08 | 0,04 |
| ITM2A         | -1,52 | -0,01 | 0,03 |
| GTSE1         | -1,52 | -2,01 | 0,05 |
| MCTP1         | -1,51 | -0,47 | 0,01 |
| HEY2          | -1,51 | -0,40 | 0,01 |
| PRR7          | -1,51 | -2,81 | 0,04 |
| CN5H6.4       | -1,50 | -5,13 | 0,04 |
| WNT5A         | -1,49 | 2,32  | 0,02 |
| DPH3P1        | -1,48 | -4,35 | 0,05 |
| DPF1          | -1,48 | -4,29 | 0,03 |
| EXO1          | -1,47 | -2,38 | 0,01 |
| PTPRT         | -1,47 | 2,06  | 0,00 |
| STON2         | -1,47 | 1,74  | 0,00 |
| SIGLEC9       | -1,46 | -3,47 | 0,03 |
| REEP1         | -1,45 | -0,80 | 0,01 |
| PEAR1         | -1,45 | -1,81 | 0,01 |
| ITGBL1        | -1,45 | -0,98 | 0,01 |
| CDC45         | -1,45 | -2,89 | 0,01 |
| MELK          | -1,44 | -0,97 | 0,01 |
| NCAPG         | -1,44 | -1,04 | 0,03 |
| CDK5R1        | -1,44 | -0,65 | 0,04 |
| FKBP10        | -1,43 | 1,18  | 0,03 |
| P2RX5-TAX1BP3 | -1,43 | -3,43 | 0,04 |



|          |       |       |      |
|----------|-------|-------|------|
| RSPH4A   | -1,43 | -1,30 | 0,01 |
| KIF20A   | -1,43 | -0,51 | 0,02 |
| TOP2A    | -1,42 | 1,90  | 0,00 |
| PPP2R2C  | -1,42 | 0,59  | 0,00 |
| ZNF296   | -1,42 | -3,07 | 0,04 |
| PTK6     | -1,41 | -2,78 | 0,02 |
| DPY19L2  | -1,41 | 0,32  | 0,02 |
| WDR66    | -1,41 | -1,65 | 0,01 |
| CERS1    | -1,41 | -2,45 | 0,02 |
| A1BG-AS1 | -1,41 | -4,50 | 0,03 |
| SPAG5    | -1,40 | -0,79 | 0,00 |
| FLJ35946 | -1,39 | 0,74  | 0,03 |
| DTL      | -1,39 | -0,91 | 0,01 |
| RYR2     | -1,39 | 2,38  | 0,01 |
| UMODL1   | -1,39 | -4,19 | 0,03 |
| BUB1     | -1,38 | -0,60 | 0,01 |
| MS4A7    | -1,37 | -0,71 | 0,00 |
| LMNB1    | -1,37 | 0,00  | 0,00 |
| CDCA3    | -1,37 | -1,94 | 0,01 |
| UBE2C    | -1,36 | -1,40 | 0,03 |
| FLJ23867 | -1,36 | -0,38 | 0,03 |
| DNASE2B  | -1,34 | 1,47  | 0,04 |
| PLEK     | -1,33 | -1,47 | 0,05 |
| MAP2     | -1,33 | 4,60  | 0,01 |
| BICC1    | -1,33 | 1,67  | 0,01 |
| SLC22A31 | -1,33 | -3,85 | 0,04 |
| CDKN2D   | -1,32 | -1,38 | 0,02 |
| F5       | -1,32 | 3,82  | 0,03 |
| SLC6A1   | -1,32 | -4,36 | 0,04 |
| SEMA3G   | -1,32 | -1,86 | 0,03 |
| KIF23    | -1,32 | -0,71 | 0,01 |
| MAP6D1   | -1,32 | 0,08  | 0,04 |
| PDE3A    | -1,31 | 1,97  | 0,00 |
| AATK     | -1,31 | -2,67 | 0,01 |
| CDK1     | -1,31 | -1,69 | 0,02 |
| GNB1L    | -1,30 | -3,25 | 0,02 |
| AURKA    | -1,30 | -1,64 | 0,05 |
| ZNF467   | -1,30 | -1,07 | 0,00 |
| CCDC108  | -1,29 | -2,16 | 0,01 |
| CIT      | -1,29 | -0,35 | 0,01 |
| SNCA     | -1,29 | 0,78  | 0,00 |
| ZP1      | -1,29 | -1,08 | 0,02 |
| MXD3     | -1,29 | -2,95 | 0,05 |
| PITPNM1  | -1,28 | -0,48 | 0,00 |
| LAG3     | -1,28 | -1,25 | 0,01 |
| CENPF    | -1,28 | 1,58  | 0,01 |
| DISP2    | -1,28 | -1,58 | 0,02 |

|          |       |       |      |
|----------|-------|-------|------|
| IER5     | -1,28 | -1,94 | 0,03 |
| VAX2     | -1,28 | -3,69 | 0,03 |
| GPR179   | -1,28 | -3,11 | 0,02 |
| ANO2     | -1,26 | -2,47 | 0,04 |
| SLA      | -1,26 | -0,98 | 0,00 |
| FAM111B  | -1,26 | -0,19 | 0,03 |
| FAM55C   | -1,26 | -0,04 | 0,00 |
| MLF1IP   | -1,26 | -0,04 | 0,00 |
| AKAP12   | -1,25 | 4,00  | 0,00 |
| TERC     | -1,25 | 0,41  | 0,01 |
| TMEFF2   | -1,24 | 6,82  | 0,00 |
| CXCL12   | -1,24 | 2,07  | 0,00 |
| EPPK1    | -1,24 | 1,01  | 0,02 |
| MTUS2    | -1,24 | 0,16  | 0,00 |
| SEC16B   | -1,23 | -1,71 | 0,01 |
| RTN1     | -1,22 | 2,69  | 0,02 |
| SLC10A5  | -1,22 | 0,94  | 0,03 |
| SPG20    | -1,22 | 2,66  | 0,00 |
| ASPM     | -1,22 | 0,21  | 0,01 |
| DRAM1    | -1,21 | 0,31  | 0,01 |
| HSPA1B   | -1,20 | 2,95  | 0,01 |
| KIF2C    | -1,20 | -2,47 | 0,04 |
| RGS2     | -1,20 | 3,13  | 0,02 |
| FAM110B  | -1,20 | 1,34  | 0,00 |
| CASC5    | -1,19 | -0,19 | 0,02 |
| ODC1     | -1,19 | 6,68  | 0,01 |
| RGS11    | -1,19 | 0,09  | 0,00 |
| GAS2L3   | -1,18 | -1,37 | 0,03 |
| CYTH3    | -1,18 | 2,17  | 0,01 |
| EME1     | -1,18 | -2,86 | 0,02 |
| FRY      | -1,18 | 1,21  | 0,00 |
| RAB3IL1  | -1,18 | -1,82 | 0,01 |
| PCSK1N   | -1,18 | -0,37 | 0,01 |
| PACSIN1  | -1,17 | -1,56 | 0,00 |
| SKA3     | -1,16 | -1,05 | 0,03 |
| PLCE1    | -1,15 | 0,42  | 0,01 |
| MDK      | -1,14 | 2,95  | 0,00 |
| RELN     | -1,14 | 2,35  | 0,01 |
| GMNN     | -1,12 | -0,37 | 0,02 |
| MAPK8IP2 | -1,12 | -0,36 | 0,04 |
| TACC3    | -1,12 | -0,92 | 0,03 |
| CSF2RA   | -1,11 | -3,07 | 0,04 |
| SKA1     | -1,11 | -1,59 | 0,02 |
| CD68     | -1,11 | 0,99  | 0,02 |
| RASSF2   | -1,10 | 0,57  | 0,02 |
| CDR2     | -1,10 | 2,77  | 0,04 |
| GGH      | -1,10 | -1,00 | 0,04 |

|          |       |       |      |
|----------|-------|-------|------|
| BAMBI    | -1,10 | 0,75  | 0,00 |
| BARX2    | -1,10 | 0,04  | 0,01 |
| PLD1     | -1,10 | -0,37 | 0,01 |
| IRF5     | -1,10 | -1,87 | 0,01 |
| ADM      | -1,09 | 0,29  | 0,04 |
| SP6      | -1,09 | -2,97 | 0,03 |
| TMEM204  | -1,09 | -0,59 | 0,02 |
| TK1      | -1,09 | -0,09 | 0,01 |
| ARSG     | -1,08 | -0,32 | 0,03 |
| IFI30    | -1,08 | 1,92  | 0,02 |
| SLCO2B1  | -1,08 | 0,01  | 0,00 |
| SASH3    | -1,08 | -1,69 | 0,05 |
| MMP11    | -1,07 | -2,46 | 0,01 |
| E2F1     | -1,07 | -1,78 | 0,03 |
| APOD     | -1,06 | 5,60  | 0,05 |
| WDR62    | -1,06 | -2,21 | 0,04 |
| CPNE7    | -1,05 | -1,02 | 0,04 |
| KIAA1683 | -1,05 | 0,40  | 0,02 |
| CMKLR1   | -1,05 | -0,88 | 0,04 |
| ANKRD19P | -1,05 | -2,40 | 0,04 |
| PHLDA2   | -1,04 | -0,53 | 0,02 |
| HELLS    | -1,04 | -0,47 | 0,01 |
| GAL3ST4  | -1,04 | -0,84 | 0,02 |
| FSD1L    | -1,03 | -0,07 | 0,01 |
| CDON     | -1,03 | 2,00  | 0,00 |
| ARL9     | -1,03 | -2,83 | 0,04 |
| BCMO1    | -1,03 | -2,55 | 0,04 |
| CD86     | -1,03 | -2,60 | 0,02 |
| FCGR2A   | -1,02 | 0,34  | 0,00 |
| CDKL3    | -1,02 | -2,41 | 0,05 |
| CENPE    | -1,02 | -0,19 | 0,03 |
| PRR11    | -1,02 | -0,67 | 0,02 |
| MAPK4    | -1,02 | 1,83  | 0,02 |
| MAD2L1   | -1,02 | -1,79 | 0,02 |
| RHBDL1   | -1,02 | -3,51 | 0,04 |
| RANBP3L  | -1,01 | 2,40  | 0,00 |
| LPGAT1   | -1,01 | 3,68  | 0,00 |
| ERRFI1   | -1,01 | 3,84  | 0,01 |
| FBP2     | -1,01 | -1,66 | 0,05 |
| SLC4A3   | -1,01 | -0,51 | 0,01 |
| FGFRL1   | -1,01 | 3,90  | 0,00 |
| CDCA5    | -1,01 | -1,26 | 0,00 |
| CRNDE    | -1,00 | -0,14 | 0,03 |

LogFC values represent  $2\log$  fold changes of RNA expression value of Gleason grade 3 in Gleason score 6 prostate cancer divided by its expression value in Gleason score  $4 + 3 = 7$  prostate cancer. Negative values represent up-regulation of genes in Gleason score  $4 + 3 = 7$  prostate cancer. LogCPM values represent  $2\log$  counts per million mapped reads.

**Supplementary Table S2: List of genes over-expressed in Gleason grade 3 tumor glands being part of a Gleason score 3 + 3 = 6 as compared to Gleason score 4 + 3 = 7**

| Gene       | logFC | logCPM | p-value |
|------------|-------|--------|---------|
| SST        | 8,51  | -3,54  | 0,00    |
| VIP        | 8,28  | -3,76  | 0,00    |
| SEMG1      | 7,92  | -4,10  | 0,00    |
| INSL5      | 7,59  | -2,74  | 0,00    |
| KIF25      | 7,53  | -4,43  | 0,00    |
| OR2T10     | 7,04  | -4,93  | 0,01    |
| ARSF       | 6,65  | -5,21  | 0,01    |
| SLC6A2     | 6,60  | -5,20  | 0,01    |
| FLJ46361   | 6,48  | -4,99  | 0,00    |
| PLA2G3     | 6,48  | -5,46  | 0,01    |
| MYH6       | 6,13  | -4,98  | 0,01    |
| GFI1B      | 6,05  | -5,19  | 0,01    |
| S100A5     | 5,96  | -5,47  | 0,01    |
| KLHL4      | 5,87  | -5,90  | 0,01    |
| SPZ1       | 5,87  | -5,99  | 0,03    |
| G6PC2      | 5,77  | -5,49  | 0,00    |
| KRT81      | 5,77  | -5,79  | 0,01    |
| GRM8       | 5,77  | -5,79  | 0,01    |
| WFIKKN2    | 5,77  | -5,80  | 0,01    |
| NHLRC4     | 5,77  | -6,09  | 0,03    |
| CARTPT     | 5,72  | -3,29  | 0,00    |
| FOXI1      | 5,67  | -5,69  | 0,02    |
| BCORP1     | 5,66  | -3,87  | 0,00    |
| OR1B1      | 5,56  | -5,86  | 0,02    |
| TWIST2     | 5,56  | -6,10  | 0,02    |
| HSD52      | 5,56  | -5,96  | 0,03    |
| CCDC164    | 5,56  | -6,21  | 0,03    |
| OR5P2      | 5,56  | -6,22  | 0,04    |
| PLA2G2F    | 5,43  | -6,35  | 0,04    |
| SLC25A31   | 5,43  | -6,17  | 0,05    |
| ORM1       | 5,43  | 3,05   | 0,00    |
| NPY2R      | 5,39  | -2,67  | 0,00    |
| PGCP1      | 5,30  | -6,02  | 0,02    |
| CSDAP1     | 5,30  | -6,06  | 0,03    |
| BTNL2      | 5,30  | -6,42  | 0,04    |
| KCNB2      | 5,30  | -6,47  | 0,04    |
| OR2T8      | 5,15  | -6,53  | 0,05    |
| AGPAT4-IT1 | 5,15  | -6,33  | 0,05    |
| KCNK7      | 4,99  | -6,63  | 0,05    |
| COL9A1     | 4,93  | 0,42   | 0,00    |
| HCG4       | 4,83  | -4,17  | 0,00    |
| TMCC2      | 4,80  | -6,53  | 0,04    |
| OR52E2     | 4,80  | -6,40  | 0,05    |

|           |      |       |      |
|-----------|------|-------|------|
| OR7D2     | 4,75 | -4,08 | 0,00 |
| FRMPD4    | 4,69 | -0,56 | 0,00 |
| SLC35D3   | 4,62 | -4,17 | 0,00 |
| PAH       | 4,56 | 0,99  | 0,01 |
| GPR116    | 4,51 | 2,59  | 0,00 |
| STAC2     | 4,48 | -4,24 | 0,01 |
| MYL1      | 4,42 | -3,64 | 0,03 |
| FOLR1     | 4,39 | -4,82 | 0,00 |
| MPZ       | 4,39 | -4,93 | 0,00 |
| GABRG2    | 4,37 | -4,32 | 0,02 |
| NTF4      | 4,34 | -5,14 | 0,02 |
| VAT1L     | 4,34 | -5,19 | 0,03 |
| HCG23     | 4,23 | -4,92 | 0,00 |
| KCNK2     | 4,23 | -5,13 | 0,01 |
| DACH2     | 4,22 | -1,31 | 0,00 |
| PCDH17    | 4,21 | 3,28  | 0,00 |
| GPR62     | 4,17 | -5,26 | 0,02 |
| GABRQ     | 4,17 | -5,08 | 0,04 |
| CPNE6     | 4,10 | -4,09 | 0,00 |
| UCN3      | 4,07 | -3,91 | 0,01 |
| IQSEC3    | 4,04 | -5,12 | 0,01 |
| KPNA7     | 3,98 | -5,29 | 0,01 |
| KCNH4     | 3,98 | -5,48 | 0,04 |
| CXorf57   | 3,93 | -4,45 | 0,00 |
| LINC00158 | 3,92 | -1,47 | 0,00 |
| SEMA5B    | 3,86 | -1,62 | 0,00 |
| NLRP14    | 3,84 | -5,40 | 0,01 |
| SLC2A5    | 3,80 | -0,09 | 0,00 |
| PTCHD3    | 3,76 | -4,58 | 0,04 |
| UPK1A     | 3,73 | -1,10 | 0,01 |
| HGF       | 3,73 | 0,47  | 0,00 |
| FCRL3     | 3,71 | -4,12 | 0,01 |
| CYP27A1   | 3,70 | 1,85  | 0,00 |
| HECW1     | 3,61 | -0,01 | 0,00 |
| DPYS      | 3,57 | -1,13 | 0,00 |
| ASCL2     | 3,54 | -5,00 | 0,02 |
| PAX8      | 3,53 | -2,43 | 0,00 |
| COL2A1    | 3,53 | 3,19  | 0,00 |
| SLC7A10   | 3,50 | -5,19 | 0,03 |
| TAF7L     | 3,50 | -5,69 | 0,04 |
| KANK4     | 3,49 | -3,30 | 0,00 |
| KRT222    | 3,48 | -4,74 | 0,03 |
| PRDM8     | 3,48 | 0,68  | 0,00 |
| KCNE3     | 3,46 | -1,36 | 0,00 |
| DEFB1     | 3,44 | -4,21 | 0,00 |
| KCNS1     | 3,38 | -2,87 | 0,01 |

|                |      |       |      |
|----------------|------|-------|------|
| CD33           | 3,36 | -4,40 | 0,00 |
| CD177          | 3,36 | 3,31  | 0,00 |
| CCK            | 3,35 | -0,77 | 0,02 |
| DRD1           | 3,33 | -2,95 | 0,01 |
| APIB1P1        | 3,32 | -2,83 | 0,00 |
| PROK1          | 3,32 | -1,57 | 0,00 |
| OVCH2          | 3,28 | -3,96 | 0,04 |
| ORM2           | 3,27 | 1,12  | 0,01 |
| TPTE2P1        | 3,26 | -4,00 | 0,01 |
| CIDEC          | 3,25 | -4,78 | 0,01 |
| FBXO17         | 3,25 | -1,65 | 0,00 |
| HOXD9          | 3,24 | -3,40 | 0,00 |
| TMEM132D       | 3,14 | -1,61 | 0,01 |
| CXCL5          | 3,13 | -3,20 | 0,02 |
| NRG2           | 3,13 | -4,48 | 0,02 |
| NAALADL1       | 3,10 | -3,87 | 0,00 |
| HOXD10         | 3,07 | -3,52 | 0,02 |
| OR2W5          | 3,06 | -5,68 | 0,05 |
| ZNF664-FAM101A | 3,06 | -5,09 | 0,02 |
| TDRD12         | 2,98 | -5,54 | 0,05 |
| COL19A1        | 2,93 | -6,08 | 0,05 |
| CCDC8          | 2,92 | -3,31 | 0,04 |
| RNF112         | 2,92 | -3,52 | 0,00 |
| SLC38A3        | 2,91 | -5,26 | 0,04 |
| SOX2           | 2,90 | -1,45 | 0,00 |
| LRRN4          | 2,88 | -2,71 | 0,00 |
| SFTPA2         | 2,87 | 5,06  | 0,00 |
| SLC22A1        | 2,85 | -3,36 | 0,00 |
| BCAT1          | 2,84 | -0,19 | 0,00 |
| GPX7           | 2,84 | -1,05 | 0,00 |
| NRG1           | 2,82 | -1,73 | 0,00 |
| CHODL          | 2,82 | -3,66 | 0,00 |
| ZNF503-AS1     | 2,82 | -2,25 | 0,00 |
| CYP3A43        | 2,78 | -3,75 | 0,04 |
| ZNF804A        | 2,78 | -4,36 | 0,01 |
| JPH2           | 2,78 | -2,54 | 0,00 |
| PMP2           | 2,76 | -2,29 | 0,00 |
| PCYT1B         | 2,76 | -3,87 | 0,02 |
| FAM106A        | 2,72 | -4,57 | 0,02 |
| EFHD1          | 2,72 | -0,34 | 0,01 |
| NEFH           | 2,71 | 5,48  | 0,01 |
| THEG5          | 2,71 | -1,70 | 0,00 |
| SLC16A5        | 2,66 | -0,87 | 0,00 |
| FLRT3          | 2,66 | 1,18  | 0,00 |
| MBOAT4         | 2,65 | -5,51 | 0,05 |
| OR2C3          | 2,64 | 0,60  | 0,00 |

|           |      |       |      |
|-----------|------|-------|------|
| PIK3C2G   | 2,59 | -3,20 | 0,02 |
| OR1L8     | 2,59 | -4,32 | 0,00 |
| ATCAY     | 2,57 | -4,37 | 0,04 |
| COL17A1   | 2,56 | 0,18  | 0,00 |
| SLC12A3   | 2,53 | -3,94 | 0,01 |
| APOB      | 2,53 | -4,49 | 0,03 |
| FABP4     | 2,53 | -3,46 | 0,01 |
| FAM83B    | 2,52 | -1,07 | 0,00 |
| VSNL1     | 2,52 | -1,89 | 0,02 |
| P2RX2     | 2,51 | -3,68 | 0,00 |
| GAP43     | 2,51 | -4,59 | 0,01 |
| PTPRN     | 2,51 | -4,37 | 0,04 |
| KCNQ5     | 2,51 | -1,84 | 0,01 |
| LINC00202 | 2,50 | -3,24 | 0,02 |
| DMKN      | 2,49 | -2,23 | 0,00 |
| SULT1C2P1 | 2,47 | -1,20 | 0,01 |
| CD28      | 2,46 | -0,05 | 0,00 |
| RND2      | 2,46 | -3,32 | 0,00 |
| NUDT9P1   | 2,45 | -5,15 | 0,02 |
| HOXD11    | 2,44 | -1,75 | 0,04 |
| BPIFB2    | 2,40 | 1,72  | 0,00 |
| SGCA      | 2,39 | -4,21 | 0,01 |
| ACTC1     | 2,39 | -2,66 | 0,02 |
| HIF3A     | 2,38 | -2,26 | 0,02 |
| ZNF208    | 2,38 | -2,89 | 0,00 |
| TRIM9     | 2,37 | -5,20 | 0,02 |
| CTF1      | 2,35 | -2,20 | 0,01 |
| DKK3      | 2,34 | 1,53  | 0,00 |
| SYTL5     | 2,33 | -1,30 | 0,00 |
| AJAP1     | 2,32 | -4,21 | 0,01 |
| BMPER     | 2,30 | -3,16 | 0,01 |
| CRIP3     | 2,29 | -5,36 | 0,05 |
| VSIG2     | 2,27 | 1,91  | 0,02 |
| DIRAS3    | 2,25 | -3,16 | 0,03 |
| LURAP1    | 2,24 | -4,17 | 0,03 |
| LINC00327 | 2,23 | -1,84 | 0,00 |
| USP44     | 2,22 | -3,19 | 0,01 |
| KRT5      | 2,22 | 1,44  | 0,03 |
| ACSS3     | 2,20 | -0,34 | 0,00 |
| MCF2      | 2,20 | -5,00 | 0,04 |
| SLC22A3   | 2,18 | 4,43  | 0,00 |
| KCNMB1    | 2,18 | -0,12 | 0,00 |
| KRT17     | 2,18 | -0,09 | 0,04 |
| TLR4      | 2,17 | 2,47  | 0,00 |
| CYS1      | 2,17 | -3,08 | 0,05 |
| IL3RA     | 2,17 | -3,96 | 0,02 |

|            |      |       |      |
|------------|------|-------|------|
| CPLX3      | 2,16 | 1,98  | 0,02 |
| ADH4       | 2,16 | -3,15 | 0,00 |
| CYP2C8     | 2,16 | -4,33 | 0,03 |
| SLC5A8     | 2,16 | -2,59 | 0,01 |
| CCR6       | 2,16 | -4,33 | 0,03 |
| LRP2       | 2,15 | -2,54 | 0,03 |
| RBFOX3     | 2,15 | -2,07 | 0,01 |
| SRD5A2     | 2,14 | -0,85 | 0,00 |
| PCDH7      | 2,14 | 1,02  | 0,00 |
| ANKRD20A8P | 2,13 | -3,36 | 0,02 |
| DLK2       | 2,12 | -1,79 | 0,02 |
| ABCC9      | 2,10 | 1,21  | 0,01 |
| TAS2R10    | 2,09 | -4,79 | 0,02 |
| POF1B      | 2,09 | 0,34  | 0,02 |
| CDH6       | 2,09 | -1,80 | 0,05 |
| RNF157     | 2,09 | 2,61  | 0,00 |
| ANO5       | 2,08 | -1,17 | 0,01 |
| ZNF215     | 2,08 | -1,72 | 0,05 |
| SNCAIP     | 2,08 | -2,37 | 0,02 |
| PAK3       | 2,07 | -1,79 | 0,02 |
| ZNF90      | 2,07 | -2,70 | 0,03 |
| OR2L13     | 2,07 | -4,07 | 0,02 |
| GPX3       | 2,07 | 3,03  | 0,00 |
| ATP1A2     | 2,06 | -1,27 | 0,00 |
| ADRA1A     | 2,06 | -2,85 | 0,02 |
| ZNF781     | 2,05 | -3,87 | 0,02 |
| SLC14A1    | 2,05 | 2,37  | 0,02 |
| RDH16      | 2,05 | -0,04 | 0,04 |
| TP63       | 2,05 | 1,02  | 0,05 |
| SOX30      | 2,04 | -3,48 | 0,02 |
| KIAA1210   | 2,03 | 0,53  | 0,01 |
| CYP26B1    | 2,02 | -2,65 | 0,02 |
| NTRK3      | 2,02 | -1,57 | 0,00 |
| ACOT11     | 2,00 | -2,82 | 0,02 |
| AXDND1     | 2,00 | -3,04 | 0,00 |
| PDPN       | 1,97 | -1,50 | 0,00 |
| PPP4R1L    | 1,96 | -2,35 | 0,02 |
| NKD2       | 1,95 | -4,39 | 0,02 |
| CCDC81     | 1,95 | -3,07 | 0,01 |
| CELF4      | 1,94 | -2,66 | 0,01 |
| ZNF257     | 1,94 | -2,18 | 0,03 |
| BMP7       | 1,93 | 0,09  | 0,03 |
| FAM3D      | 1,92 | 0,02  | 0,00 |
| CNGA4      | 1,90 | -4,41 | 0,05 |
| NDNF       | 1,89 | 0,55  | 0,01 |
| SIX2       | 1,88 | -3,62 | 0,03 |



|             |      |       |      |
|-------------|------|-------|------|
| ATP6V0D2    | 1,88 | -3,32 | 0,03 |
| SMOC1       | 1,88 | -2,04 | 0,03 |
| LAMP5       | 1,87 | -0,47 | 0,04 |
| MPP2        | 1,86 | -3,30 | 0,04 |
| ACTG2       | 1,85 | 4,76  | 0,00 |
| MACROD2-AS1 | 1,84 | -3,31 | 0,02 |
| WISP2       | 1,84 | -4,52 | 0,01 |
| ZNF711      | 1,83 | -0,81 | 0,01 |
| BCL2L15     | 1,83 | -1,85 | 0,04 |
| HSPB8       | 1,82 | -0,30 | 0,01 |
| RNF165      | 1,82 | -1,85 | 0,04 |
| CHRD1       | 1,82 | 1,27  | 0,00 |
| PTN         | 1,81 | 4,46  | 0,00 |
| ASB5        | 1,81 | -0,09 | 0,01 |
| DNM1        | 1,80 | -2,78 | 0,05 |
| ZNF454      | 1,80 | -1,21 | 0,01 |
| CDH3        | 1,80 | 1,34  | 0,00 |
| SLITRK5     | 1,77 | -1,26 | 0,01 |
| VIT         | 1,77 | -3,57 | 0,03 |
| GTF2IRD2B   | 1,77 | -4,10 | 0,01 |
| SOCS1       | 1,76 | -1,17 | 0,05 |
| DCHS1       | 1,75 | 2,85  | 0,00 |
| ZNF300P1    | 1,75 | -1,49 | 0,03 |
| CDCA7       | 1,73 | -0,39 | 0,00 |
| LAYN        | 1,72 | -2,41 | 0,04 |
| SRPX        | 1,71 | -1,71 | 0,01 |
| SULT4A1     | 1,71 | -4,84 | 0,03 |
| PGM5        | 1,71 | 1,02  | 0,00 |
| WFDC1       | 1,70 | -1,71 | 0,04 |
| MYL9        | 1,70 | 3,16  | 0,00 |
| LSAMP       | 1,69 | 2,80  | 0,04 |
| ISL1        | 1,69 | -1,73 | 0,01 |
| ADAMTS5     | 1,69 | -2,29 | 0,02 |
| SLC5A4      | 1,68 | 0,73  | 0,00 |
| TMEM35      | 1,68 | -3,03 | 0,03 |
| MET         | 1,68 | 0,50  | 0,02 |
| HCAR1       | 1,67 | 1,20  | 0,00 |
| MYOCD       | 1,65 | -0,02 | 0,01 |
| LG14        | 1,65 | -3,23 | 0,02 |
| RIN3        | 1,65 | -0,40 | 0,02 |
| GRIK5       | 1,64 | -2,86 | 0,02 |
| PKD2L2      | 1,64 | -3,61 | 0,01 |
| TBX5        | 1,64 | -2,71 | 0,05 |
| PDZRN4      | 1,63 | -1,60 | 0,01 |
| RFPL2       | 1,63 | 0,71  | 0,00 |
| RAPGEF4     | 1,62 | 2,65  | 0,00 |

|            |      |       |      |
|------------|------|-------|------|
| PCP4       | 1,61 | 0,82  | 0,01 |
| HCAR3      | 1,60 | -4,32 | 0,03 |
| SERPINF1   | 1,60 | 0,73  | 0,00 |
| PHYHIPL    | 1,60 | -1,34 | 0,02 |
| P2RX1      | 1,59 | -3,26 | 0,05 |
| SPEG       | 1,58 | -2,18 | 0,03 |
| NRK        | 1,58 | -1,74 | 0,01 |
| IL5RA      | 1,58 | 0,77  | 0,00 |
| FAM86B1    | 1,57 | -2,56 | 0,02 |
| PTGIS      | 1,57 | -0,10 | 0,00 |
| IGFBP6     | 1,56 | -0,74 | 0,00 |
| SERTAD4    | 1,56 | -1,53 | 0,03 |
| SLC16A7    | 1,56 | -2,84 | 0,02 |
| ST6GALNAC4 | 1,56 | -3,54 | 0,04 |
| IL33       | 1,56 | -0,89 | 0,03 |
| KCNU1      | 1,55 | -3,20 | 0,02 |
| FERMT1     | 1,55 | 2,19  | 0,00 |
| MAGI2-AS3  | 1,54 | -1,34 | 0,04 |
| TGFB1I1    | 1,53 | -0,37 | 0,03 |
| GCG        | 1,53 | -1,42 | 0,03 |
| PLCL2      | 1,53 | -2,85 | 0,05 |
| PLIN2      | 1,53 | 1,96  | 0,00 |
| KLRG1      | 1,53 | -2,37 | 0,04 |
| PZP        | 1,53 | -2,66 | 0,02 |
| CYP3A5     | 1,53 | 1,06  | 0,03 |
| WIF1       | 1,52 | -3,16 | 0,02 |
| ABCA6      | 1,52 | -1,06 | 0,00 |
| ACTA2      | 1,52 | 4,38  | 0,00 |
| ID4        | 1,52 | -0,40 | 0,01 |
| GALNT14    | 1,51 | -3,17 | 0,04 |
| FAM133B    | 1,51 | -3,66 | 0,03 |
| ADH6       | 1,50 | -1,83 | 0,00 |
| FUT9       | 1,48 | -1,57 | 0,02 |
| NINL       | 1,48 | 0,33  | 0,01 |
| CNN1       | 1,48 | 1,75  | 0,01 |
| PHACTR1    | 1,48 | -2,21 | 0,01 |
| MAGI2      | 1,48 | 1,31  | 0,01 |
| RAB9B      | 1,48 | -1,85 | 0,01 |
| FGF7       | 1,48 | -1,02 | 0,03 |
| EFEMP1     | 1,47 | 0,66  | 0,00 |
| FLNA       | 1,47 | 3,94  | 0,00 |
| FAT3       | 1,47 | 0,32  | 0,01 |
| SYT6       | 1,46 | -0,04 | 0,00 |
| FMO4       | 1,46 | -0,65 | 0,03 |
| MYOF       | 1,45 | 3,40  | 0,01 |
| FLG2       | 1,45 | -3,48 | 0,02 |

|             |      |       |      |
|-------------|------|-------|------|
| UCHL1       | 1,45 | -1,17 | 0,04 |
| BOC         | 1,45 | 1,33  | 0,01 |
| ZNF843      | 1,44 | -3,92 | 0,03 |
| MAML2       | 1,44 | 2,98  | 0,01 |
| ACSM3       | 1,44 | 3,04  | 0,00 |
| PTGDS       | 1,43 | 1,54  | 0,00 |
| KLHL10      | 1,43 | -4,72 | 0,05 |
| FREM2       | 1,42 | -0,21 | 0,01 |
| SP140L      | 1,42 | -0,74 | 0,04 |
| FAIM2       | 1,42 | -1,55 | 0,01 |
| COL25A1     | 1,41 | 0,62  | 0,00 |
| CCL2        | 1,41 | 1,91  | 0,03 |
| TPM2        | 1,40 | 3,31  | 0,00 |
| TSC22D1-AS1 | 1,40 | -3,07 | 0,03 |
| LDB3        | 1,39 | -0,79 | 0,03 |
| NOV         | 1,39 | 2,47  | 0,00 |
| MYH11       | 1,39 | 5,90  | 0,00 |
| IGFBP5      | 1,38 | 4,34  | 0,03 |
| CYP1B1      | 1,38 | 5,20  | 0,00 |
| ADPRHL1     | 1,37 | 0,55  | 0,03 |
| FLNC        | 1,37 | 1,24  | 0,00 |
| SEMA7A      | 1,36 | -3,38 | 0,04 |
| NT5E        | 1,36 | -1,23 | 0,02 |
| PRH2        | 1,36 | -1,76 | 0,01 |
| PRKY        | 1,34 | 0,36  | 0,00 |
| ZNF185      | 1,34 | 1,28  | 0,00 |
| MYOM1       | 1,34 | -1,61 | 0,01 |
| POU5F2      | 1,33 | -3,20 | 0,03 |
| ZNF774      | 1,33 | -1,03 | 0,01 |
| SCNN1A      | 1,33 | 3,05  | 0,01 |
| FLJ10661    | 1,32 | -3,61 | 0,05 |
| NCKAP5      | 1,31 | 2,26  | 0,00 |
| NUDT18      | 1,30 | -2,31 | 0,03 |
| MSRB3       | 1,29 | 0,97  | 0,01 |
| TAGLN       | 1,29 | 3,19  | 0,00 |
| LEPREL2     | 1,29 | -1,66 | 0,01 |
| PTRF        | 1,29 | 2,53  | 0,04 |
| CNN3        | 1,29 | 4,08  | 0,00 |
| NRCAM       | 1,29 | 2,16  | 0,02 |
| ZNF469      | 1,29 | -1,79 | 0,02 |
| ESR2        | 1,28 | -3,21 | 0,01 |
| RPA4        | 1,28 | -3,66 | 0,05 |
| MRV11       | 1,28 | 0,83  | 0,02 |
| MARVELD1    | 1,27 | 0,15  | 0,01 |
| NHS         | 1,27 | -0,06 | 0,01 |
| HOTTIP      | 1,27 | 1,28  | 0,02 |

|          |      |       |      |
|----------|------|-------|------|
| ID2      | 1,27 | 2,12  | 0,03 |
| CSPG4    | 1,27 | -0,83 | 0,02 |
| CDH26    | 1,26 | 2,58  | 0,00 |
| PATE4    | 1,26 | -1,73 | 0,01 |
| LMOD1    | 1,26 | 1,89  | 0,02 |
| MCAM     | 1,26 | -1,19 | 0,04 |
| ZNF578   | 1,26 | -0,14 | 0,01 |
| CCDC3    | 1,25 | -1,14 | 0,04 |
| ZNF655   | 1,24 | 3,07  | 0,00 |
| RND3     | 1,24 | 0,50  | 0,04 |
| BNIPL    | 1,24 | -2,16 | 0,03 |
| TGFB3    | 1,23 | 2,65  | 0,01 |
| EML5     | 1,23 | 2,38  | 0,00 |
| RGNEF    | 1,22 | 0,34  | 0,04 |
| RGS7BP   | 1,22 | -0,93 | 0,03 |
| SLC22A17 | 1,22 | 0,91  | 0,03 |
| AOC3     | 1,22 | 0,87  | 0,02 |
| MYLK     | 1,22 | 4,02  | 0,01 |
| CORO2B   | 1,21 | -2,88 | 0,02 |
| MSTN     | 1,21 | -2,98 | 0,05 |
| TTY10    | 1,21 | -1,78 | 0,02 |
| SCRG1    | 1,20 | -3,26 | 0,04 |
| DFNB59   | 1,19 | -3,32 | 0,04 |
| SYNPO2   | 1,19 | 4,28  | 0,01 |
| LPXN     | 1,19 | 1,21  | 0,02 |
| ANKRD31  | 1,19 | -2,58 | 0,04 |
| DES      | 1,18 | 2,94  | 0,01 |
| PASK     | 1,18 | 1,27  | 0,02 |
| SFN      | 1,18 | 1,80  | 0,01 |
| COLQ     | 1,18 | -2,15 | 0,02 |
| FBLN1    | 1,17 | 2,67  | 0,02 |
| CNTN1    | 1,17 | 0,00  | 0,01 |
| PDLIM4   | 1,16 | 0,58  | 0,02 |
| COTL1    | 1,15 | 2,65  | 0,02 |
| PCDHB19P | 1,15 | -1,89 | 0,01 |
| APLF     | 1,14 | -0,83 | 0,04 |
| SYNM     | 1,14 | 3,27  | 0,02 |
| UCP2     | 1,14 | 1,56  | 0,04 |
| SERPING1 | 1,12 | 3,19  | 0,00 |
| AHNAK2   | 1,12 | 0,27  | 0,02 |
| BCAS1    | 1,11 | 4,00  | 0,02 |
| ARSJ     | 1,10 | 1,25  | 0,00 |
| CPAMD8   | 1,09 | 1,11  | 0,03 |
| GNG4     | 1,07 | 3,65  | 0,02 |
| DLL1     | 1,06 | 0,12  | 0,04 |
| CACNB4   | 1,05 | 0,61  | 0,04 |

|          |      |       |      |
|----------|------|-------|------|
| GSTA4    | 1,05 | 2,69  | 0,00 |
| HERPUD1  | 1,04 | 5,70  | 0,00 |
| LEF1     | 1,04 | 1,24  | 0,01 |
| FAT4     | 1,04 | 0,43  | 0,04 |
| NPAS2    | 1,03 | 3,97  | 0,00 |
| CHL1     | 1,03 | 2,44  | 0,05 |
| SPARCL1  | 1,03 | 3,94  | 0,02 |
| TMEM200A | 1,03 | -0,74 | 0,01 |
| TNS1     | 1,02 | 4,43  | 0,03 |
| MXRA7    | 1,01 | 1,97  | 0,02 |

LogFC values represent  $2\log$  fold changes of RNA expression value of Gleason grade 3 in Gleason score 6 prostate cancer divided by its expression value in Gleason score  $4 + 3 = 7$  prostate cancer. Positive values represent up-regulation of genes in Gleason score  $3 + 3 = 6$  prostate cancer. LogCPM values represent  $2\log$  counts per million mapped reads.
